# Supplementary material
Source: publisher figshare collection journal article supplement (https://acs.figshare.com/ndownloader/files/5788161)

# Catalytic Carbonylation of Functionalized Diamines: Application to the Core Structure of DMP 323 and DMP 450

*Keisha-Gay Hylton, A. Denise Main and Lisa McElwee-White\*.*  
Department of Chemistry and Center for Catalysis, University of Florida,  
Gainesville, Florida 32611-7200

| Contents                                                                              | Page |
|---------------------------------------------------------------------------------------|------|
| <b>Cover page</b>                                                                     | S1   |
| <b>Figure S1.</b> $^1\text{H}$ NMR spectrum of amine <b>8</b>                         | S2   |
| <b>Figure S2.</b> $^{13}\text{C}$ NMR spectrum of amine <b>8</b>                      | S3   |
| <b>Figure S3.</b> $^1\text{H}$ NMR spectrum of urea <b>10</b> (mixture of isomers)    | S4   |
| <b>Figure S4.</b> $^{13}\text{C}$ NMR spectrum of urea <b>10</b> (major isomer)       | S5   |
| <b>Figure S5.</b> $^{13}\text{C}$ NMR spectrum of urea <b>10</b> (mixture of isomers) | S6   |

Figure S1.

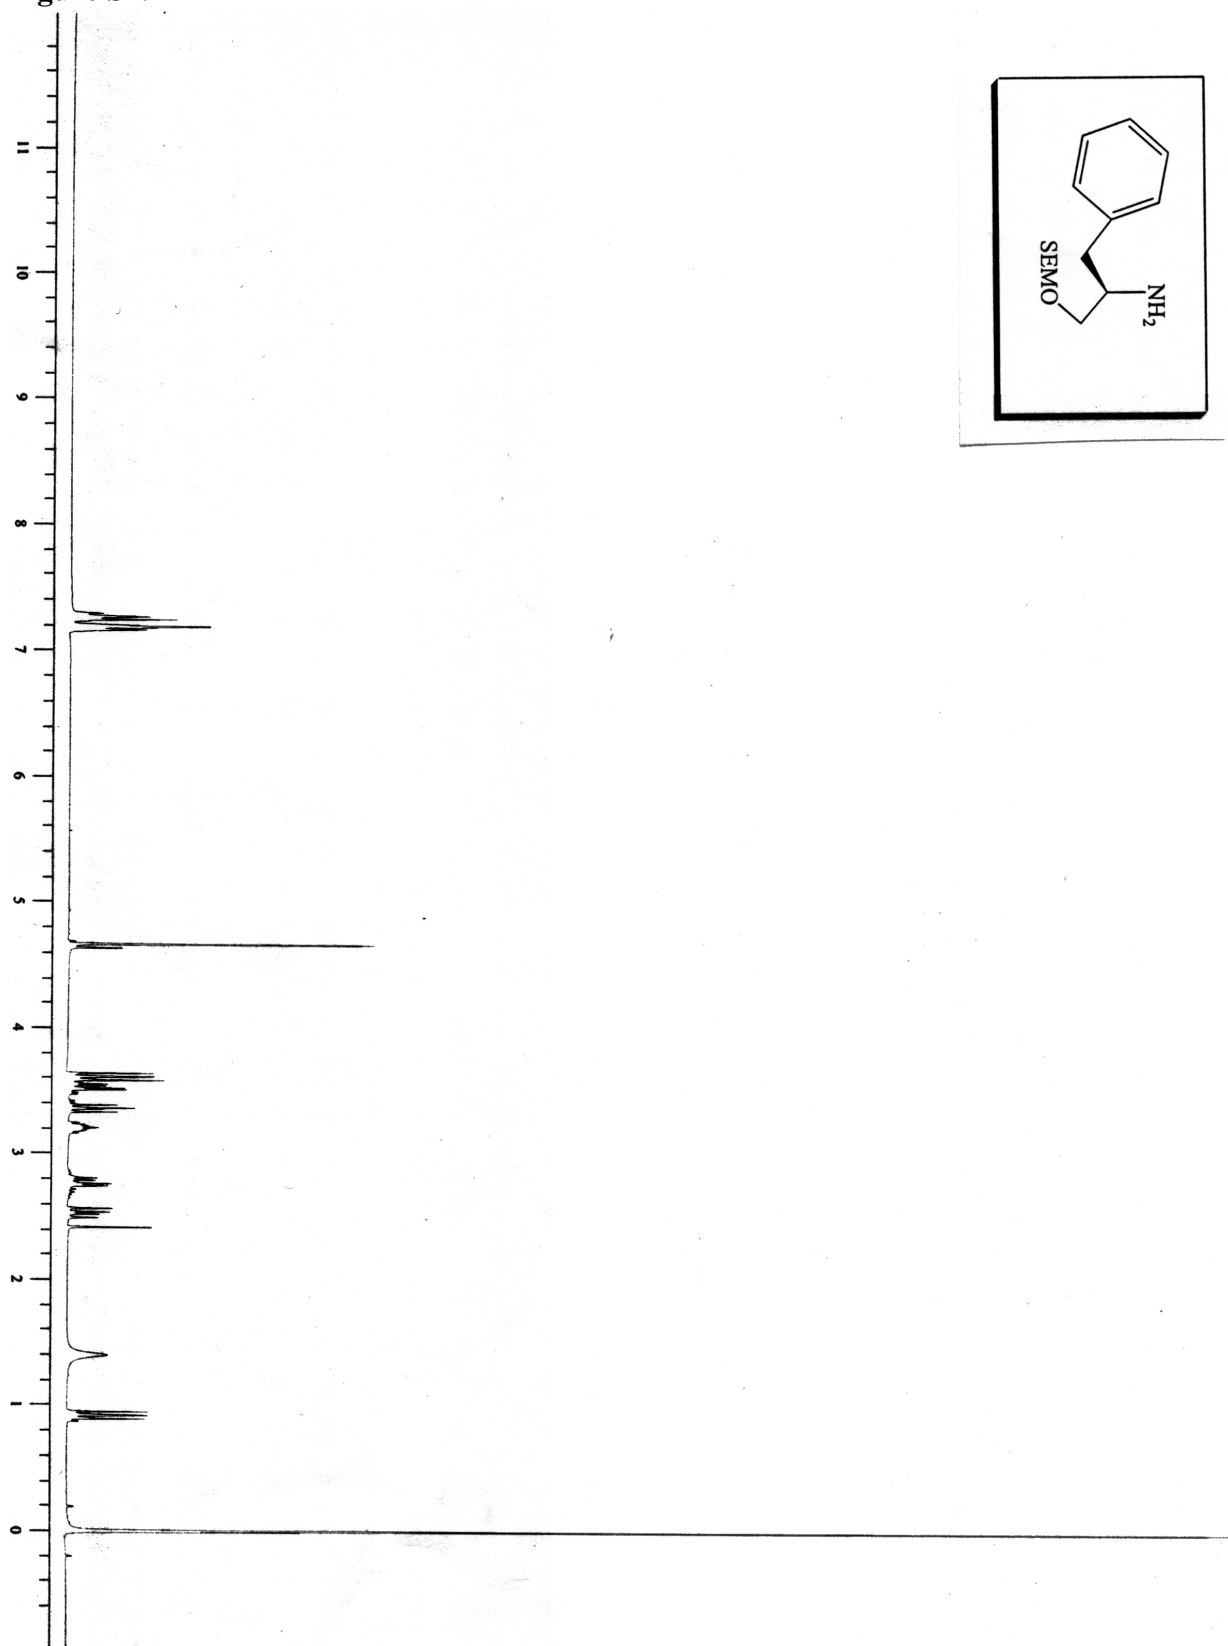

Figure S2.

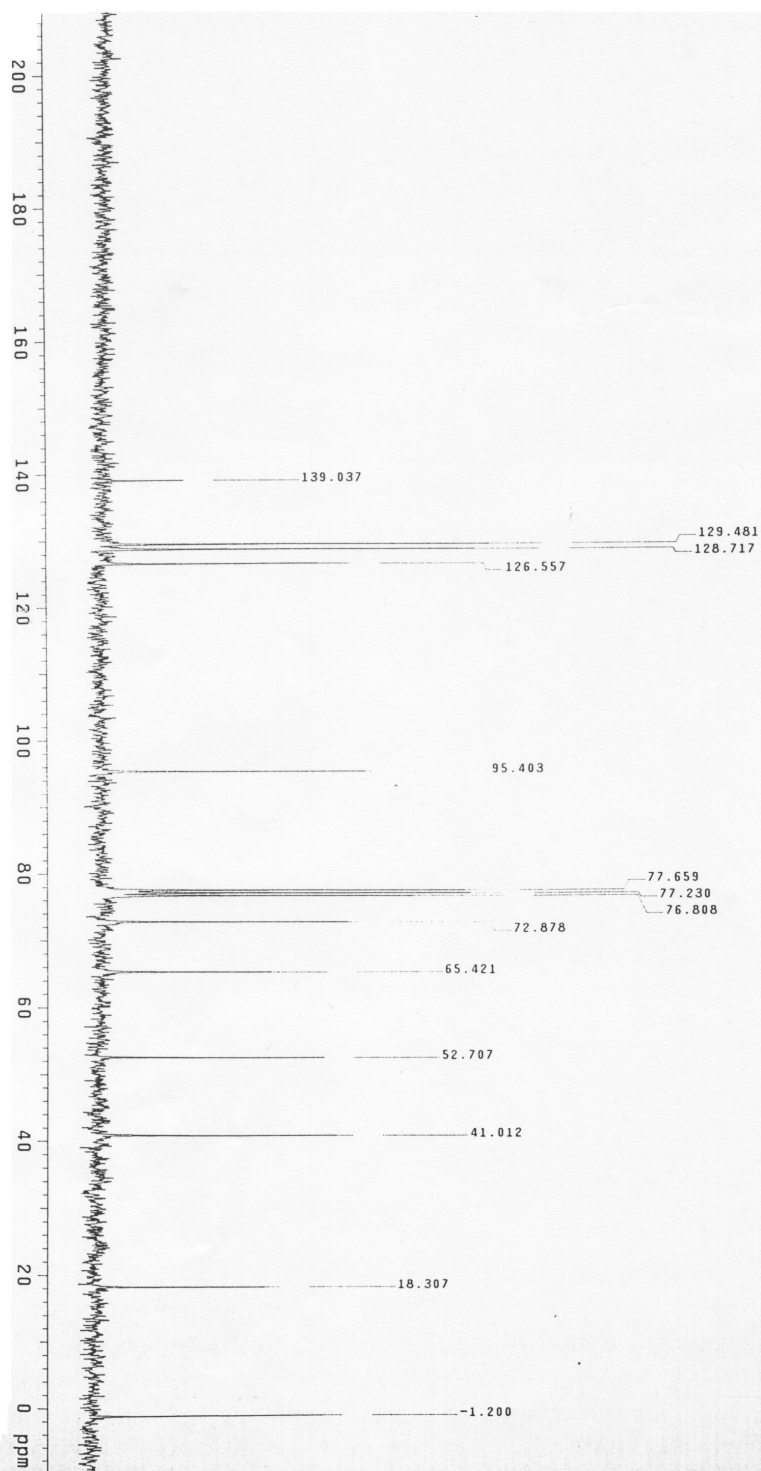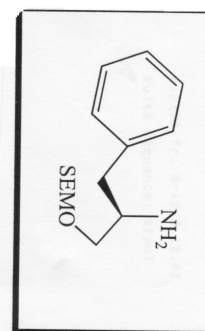

Figure S3.

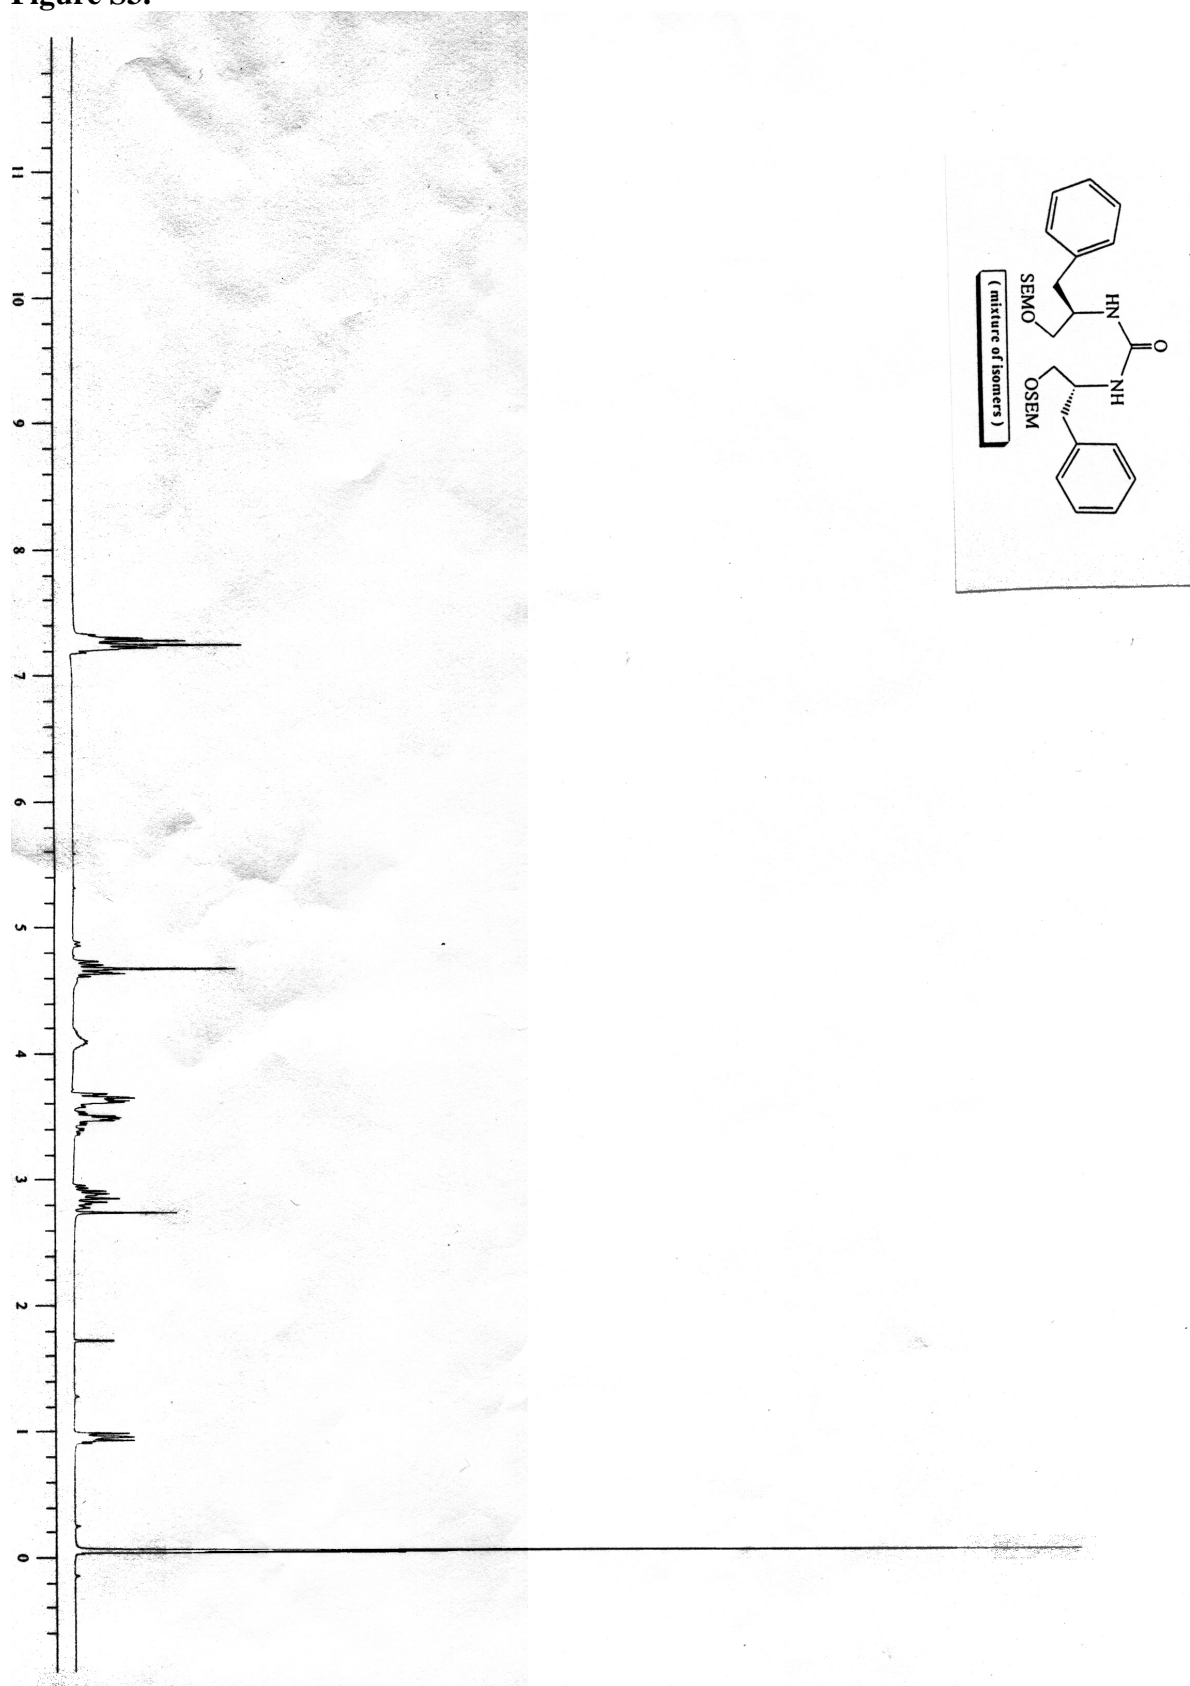



Figure S4.

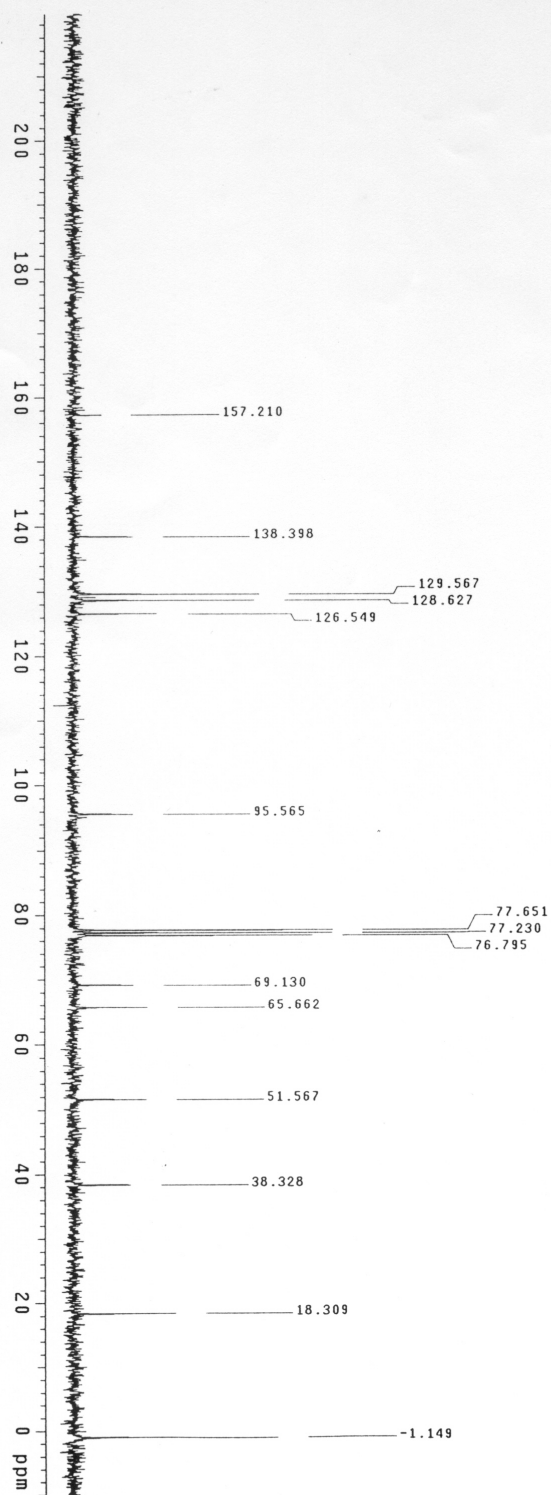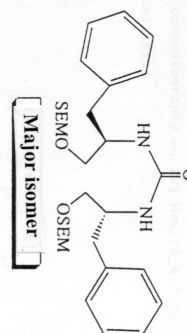

Figure S5.

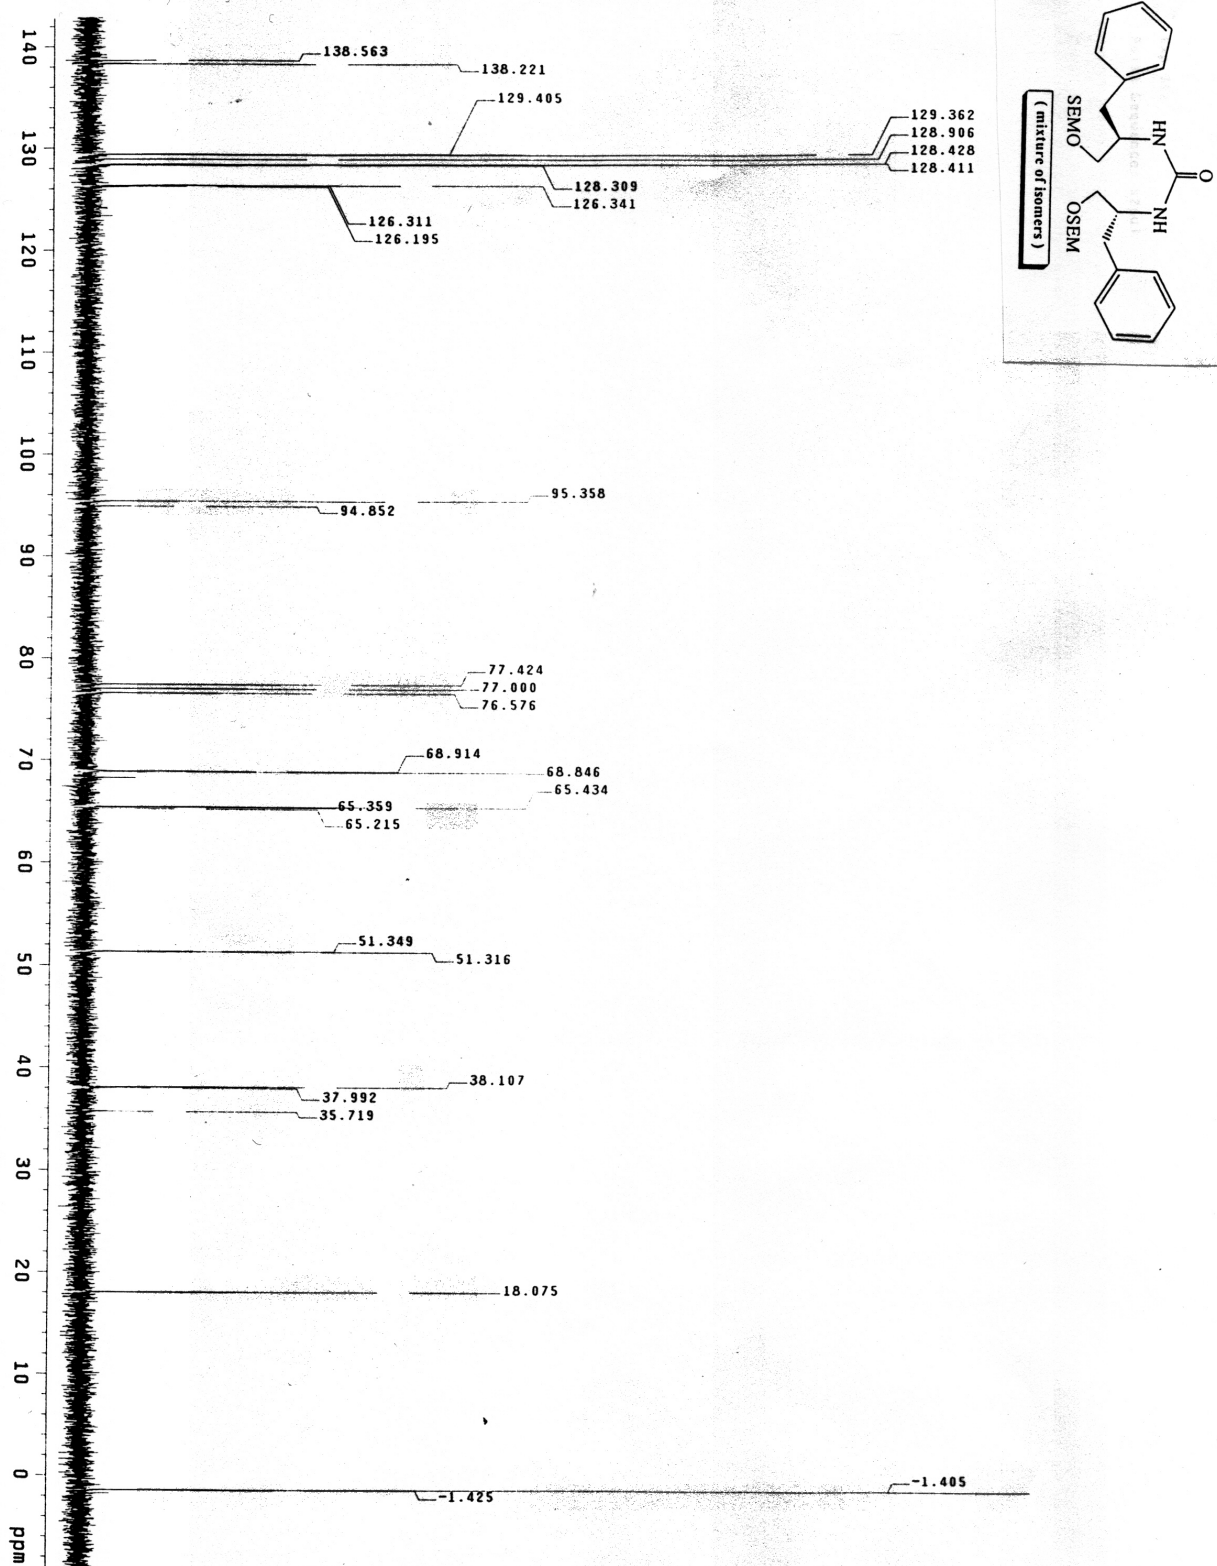

Supplement: Supplementary file 1 [file 5788161]
